# Supplementary material
Source: PubMed Central journal article supplement (PMC4799504)

Supplementary Figure 1

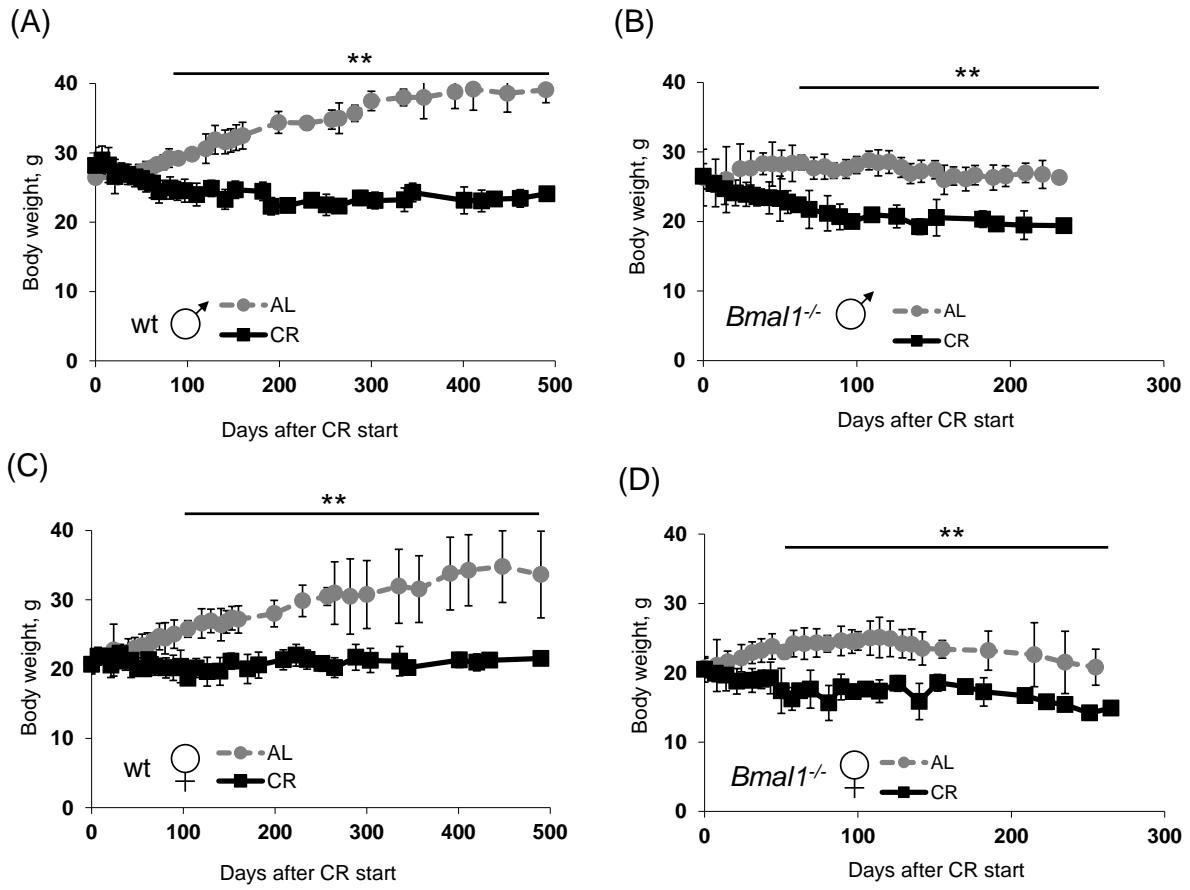

Supplementary Figure 2

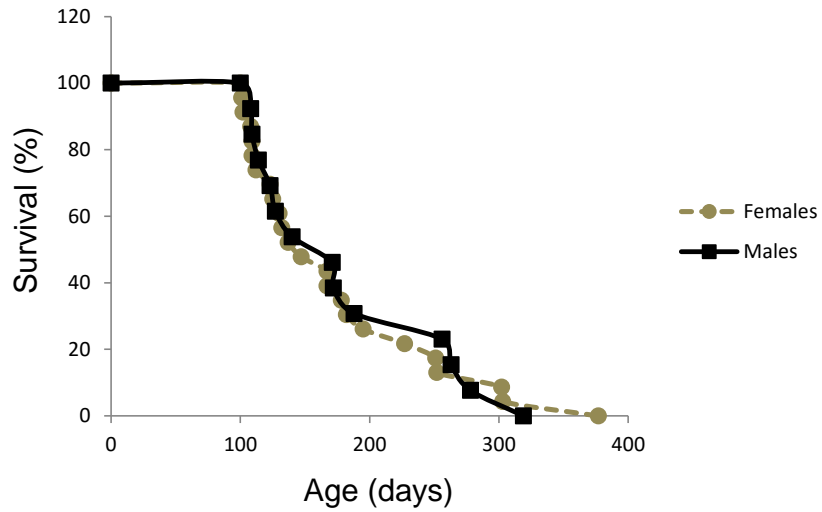

Supplementary Figure 3

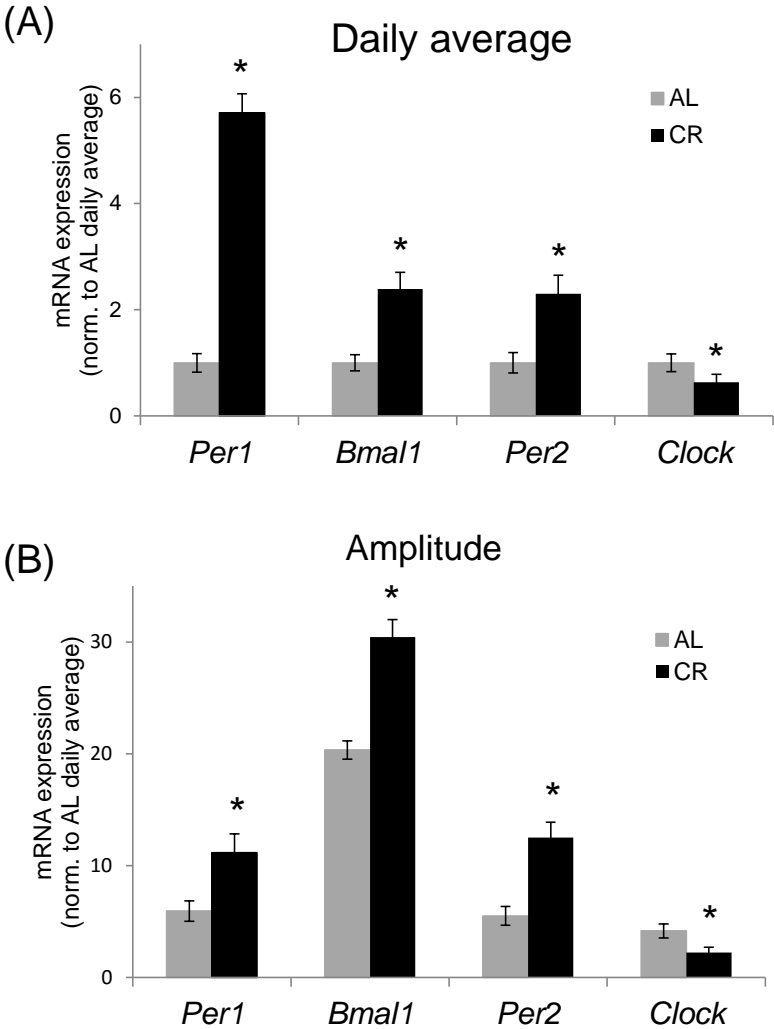

Supplement: supp_fj.15-282475_Supplemental_Figures.pdf [file supp_fj.15-282475_Supplemental_Figures.pdf]
